# Supplementary material for: Novel Bruton’s Tyrosine Kinase inhibitor remibrutinib: Drug‐drug interaction potential as a victim of CYP3A4 inhibitors based on clinical data and PBPK modeling
Source: PubMed Central journal article supplement — Clin Transl Sci. 2021 Aug 25;15(1):118–29. doi: 10.1111/cts.13126 (PMC8742645; doi:10.1111/cts.13126), 2021-08-25
Supplement: CTS-15-118-s002.pdf [file CTS-15-118-s002.pdf]

Figure S3: Predicted and observed remibrutinib PK profiles across doses 25, 100 and 400 mg q.d.<sup>a)</sup>

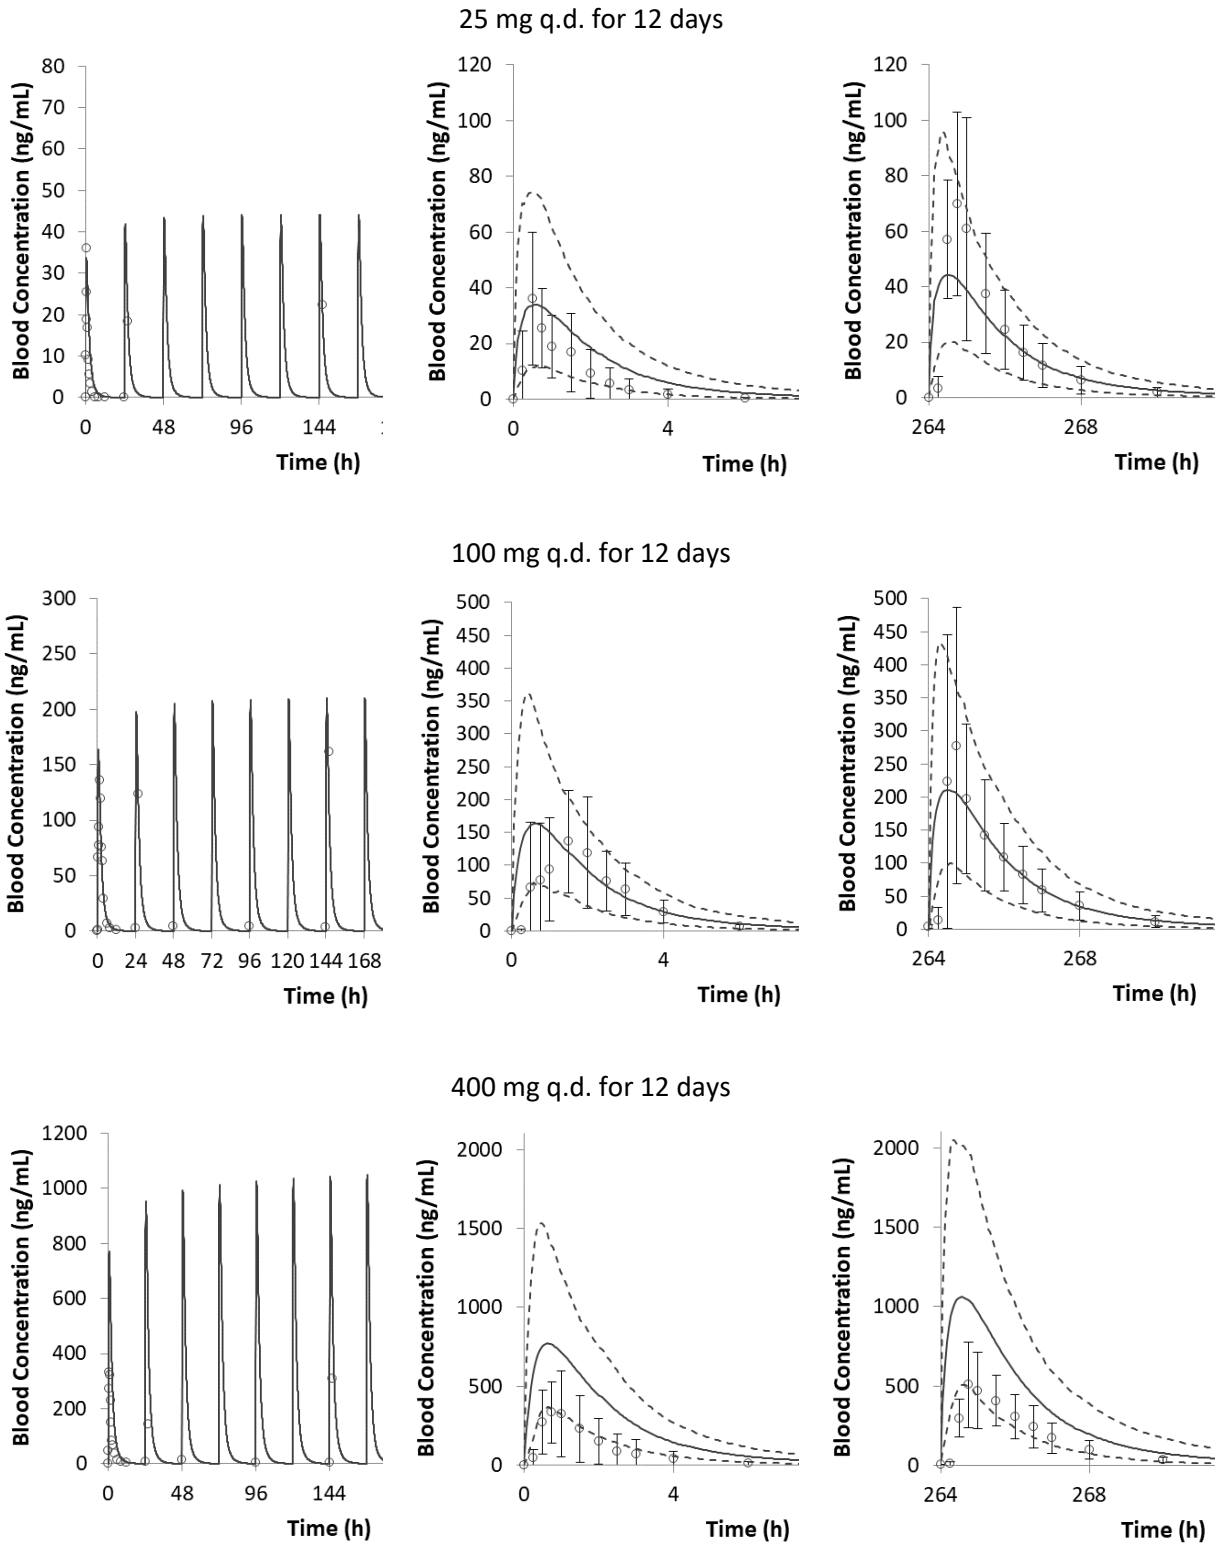

a) at 400 mg the PBPK model tends to over-predict exposure as the solubility-limited absorption at doses beyond 200 mg is not considered. q.d., once daily
