# Supplementary material for: Novel Bruton’s Tyrosine Kinase inhibitor remibrutinib: Drug‐drug interaction potential as a victim of CYP3A4 inhibitors based on clinical data and PBPK modeling
Source: PubMed Central journal article supplement — Clin Transl Sci. 2021 Aug 25;15(1):118–29. doi: 10.1111/cts.13126 (PMC8742645; doi:10.1111/cts.13126), 2021-08-25
Supplement: CTS-15-118-s003.pdf [file CTS-15-118-s003.pdf]

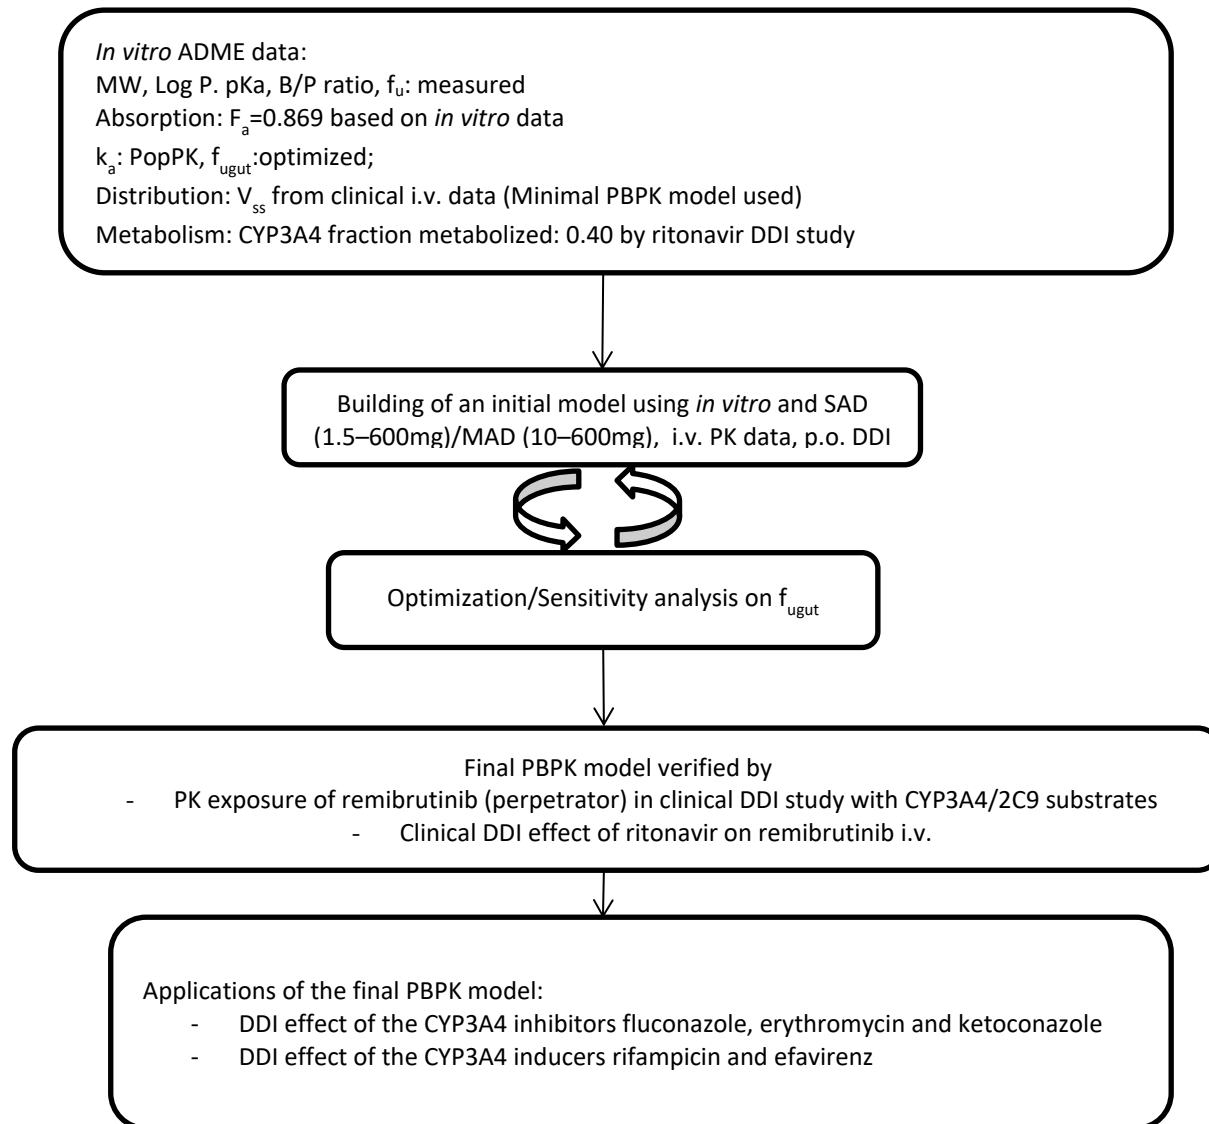

**Figure S2.** PBPK model development scheme for remibrutinib

ADME, absorption, distribution, metabolism, and excretion; B/P, blood/plasma; CL, systemic drug clearance; DDI, Drug-drug interaction;  $F_a$ , fraction of the dose absorbed from gastrointestinal tract;  $f_{ugut}$ , unbound fraction in enterocytes; i.v., intravenous;  $k_a$ , absorption rate constant [first-order]; Log P, partition coefficient; MAD, multiple ascending dose; MW, molecular weight; PBPK, physiologically based pharmacokinetics; pKa, acid dissociation constant; PopPK, population pharmacokinetics; SAD, single ascending dose;  $V_{ss}$ , apparent volume of distribution at steady state.
