# Supplementary material for: Novel Bruton’s Tyrosine Kinase inhibitor remibrutinib: Drug‐drug interaction potential as a victim of CYP3A4 inhibitors based on clinical data and PBPK modeling
Source: PubMed Central journal article supplement — Clin Transl Sci. 2021 Aug 25;15(1):118–29. doi: 10.1111/cts.13126 (PMC8742645; doi:10.1111/cts.13126), 2021-08-25
Supplement: CTS-15-118-s005.pdf [file CTS-15-118-s005.pdf]

### C<sub>max</sub> residuals

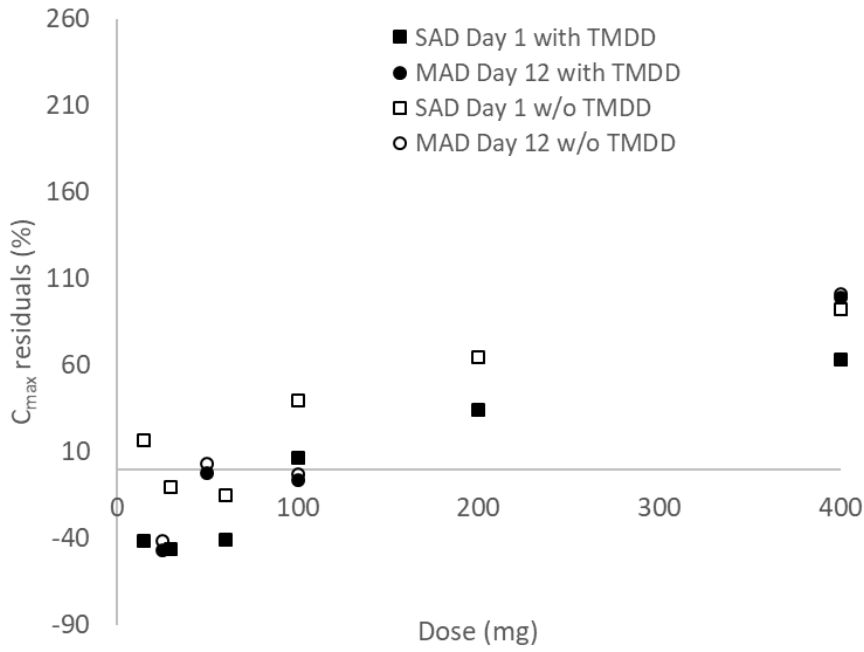

### AUC residuals

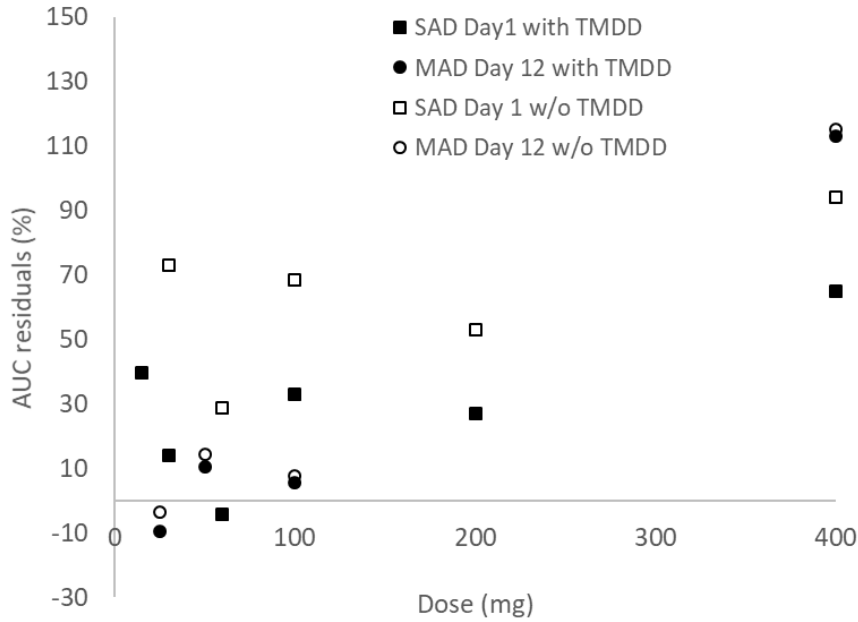

**Figure S1.** Prediction accuracy across the dose range of 15–400 mg based on residual values

AUC, area under the blood concentration-time; C<sub>max</sub>, maximum (peak) blood drug concentration; MAD, multiple dose; SAD, single dose; TMDD, target-mediated drug disposition; w/o, without
